# Supplementary material for: Conserved and divergent functions of Pax6 underlie species-specific neurogenic patterns in the developing amniote brain
Source: PubMed Central journal article supplement (PMC5964652; doi:10.1242/dev.159764), 2018-04-16
Supplement: DEV159764supp.pdf [file DEV159764supp.pdf]

## Supplementary Information

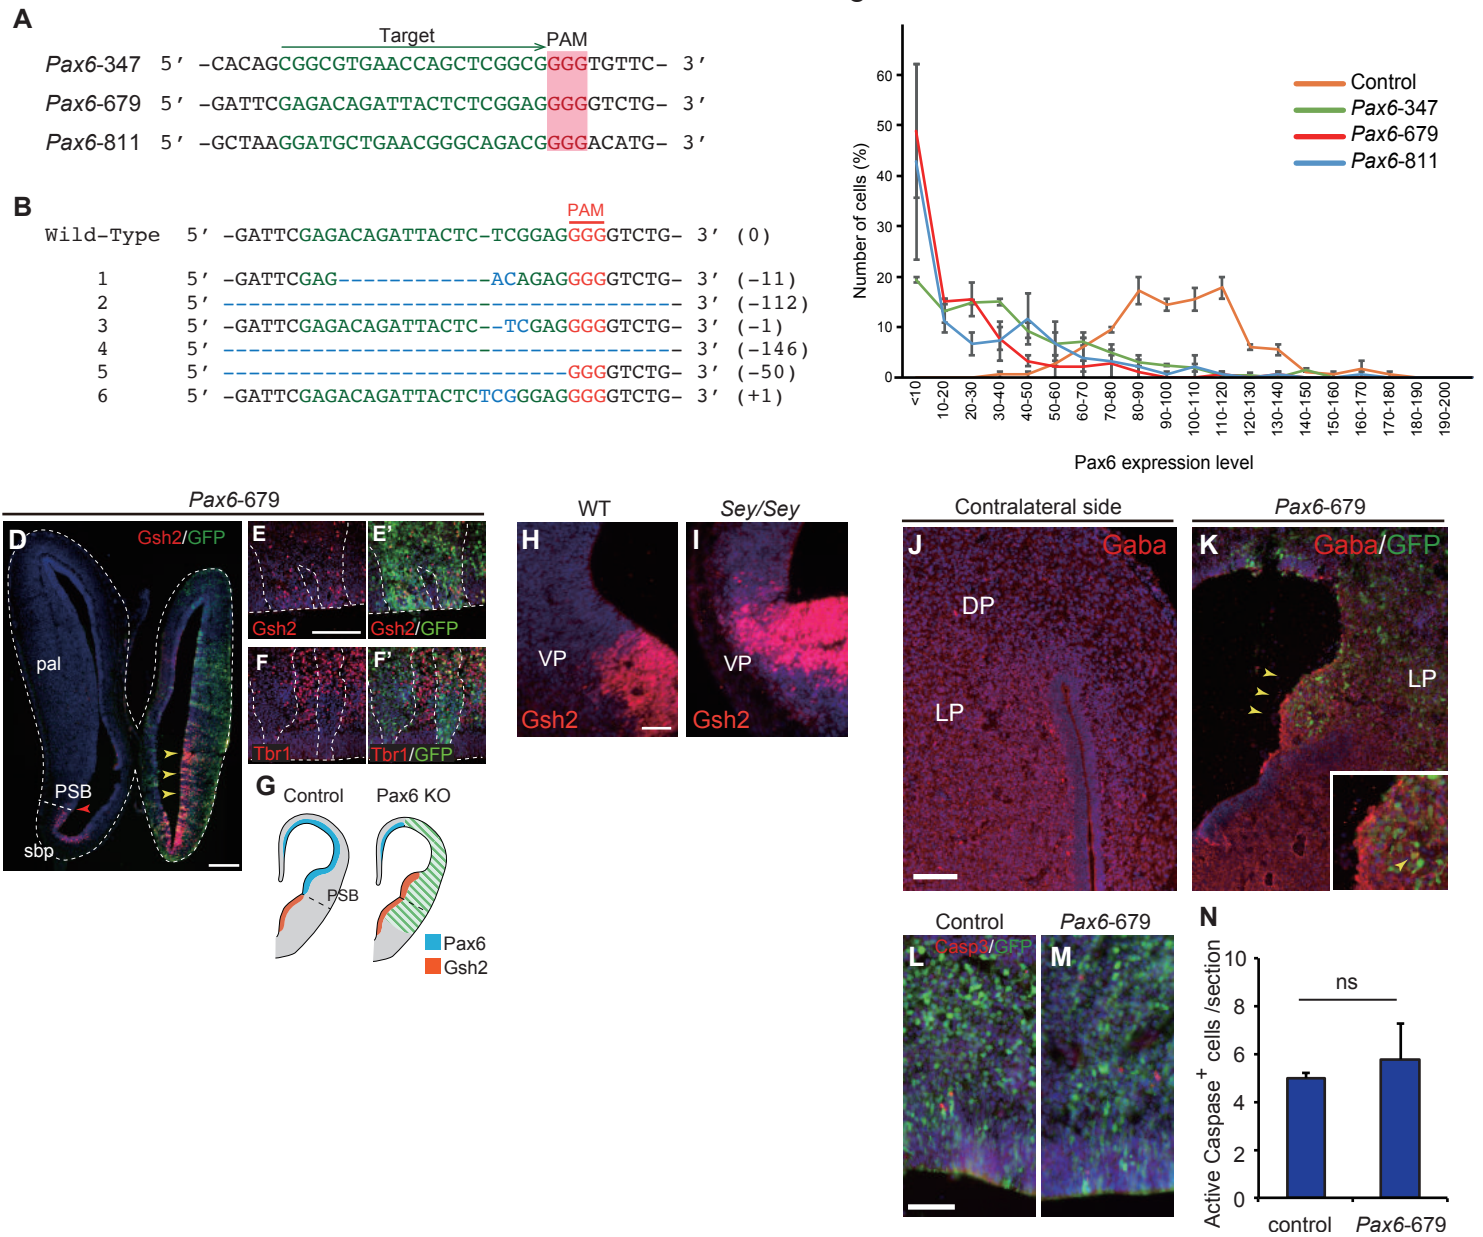

**Fig. S1 (related to Fig. 1). CRISPR/Cas9-mediated targeting of the *Pax6* gene in the developing chick pallium.**

(A) Target sequences of single-guide RNAs (sgRNA) (green) upstream of the PAM sequence (red) in the chick *Pax6* gene. (B) Representative mutant sequences of *Pax6* after electroporation of *pX330-Pax6-679*. Indels are indicated in blue. Target sequences of sgRNA and PAM sequences are indicated as green and red, respectively. (C) The expression level of *Pax6* in the developing chick pallium after electroporation of *pX330-Pax6* vectors. The histogram shows the signal intensity of *Pax6* in samples transfected with control vector or *pX330-Pax6* vectors (mean  $\pm$  s.e., n=4 animals in each group). (D, E, E', F, F') Ectopic expression of *Gsh2* and reduced *Tbr1* expression in the E6 chick pallium transfected with *pX330-Pax6-679*. (G) Schematic illustration of the phenotype of the *Pax6*-deleted chick pallium. The area shown with a green oblique line indicates the electroporated region. (H, I) *Gsh2* expression in E12.5 wild-type (H) and *Small eye (Sey/Sey)* (I) mice. In *Sey/Sey*, ectopic *Gsh2* expression is evident at the VP. (J, K) Accumulation of Gaba-positive cells in the ventricular zone of E10 chick pallium transfected with *pX330-Pax6-679*. (L-N) Active caspase 3-positive cells in brains transfected with control and *pX330-Pax6-679* vectors. Scale bars: 200  $\mu$ m (D, H, J), 50  $\mu$ m (E, L).

## Chick E4- E5 Clonal Analyses

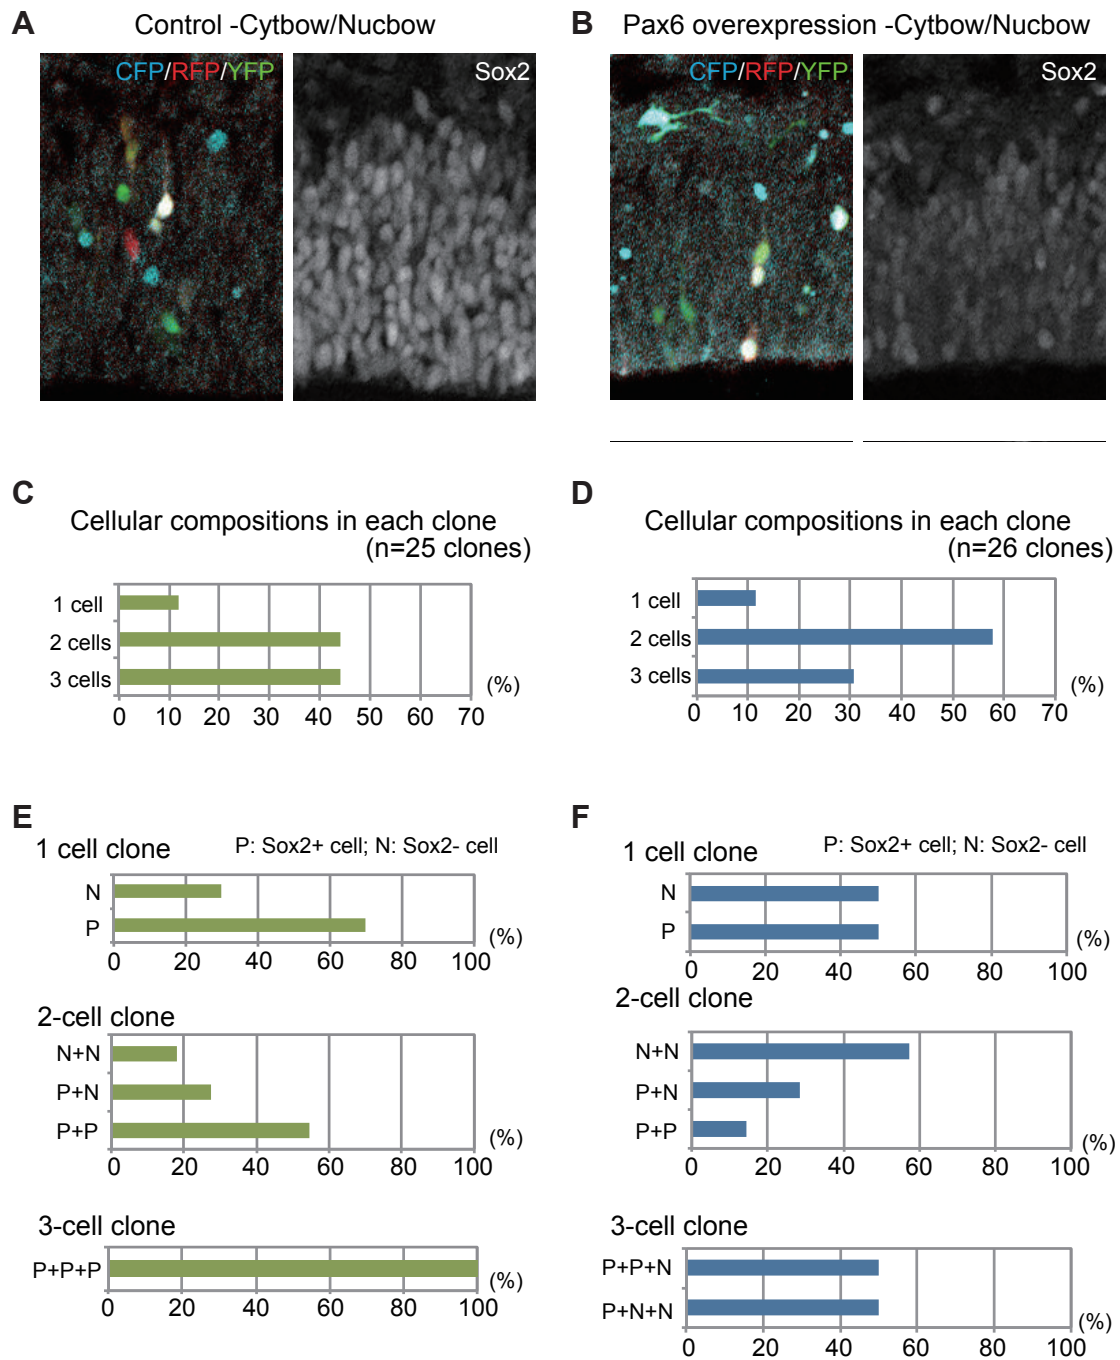

**Fig. S2 (related to Fig. 2). High-dose Pax6 increases neurogenic divisions in the developing chick pallium.**

(A, B) Distributions of clonally related cells in E5 chick pallium transfected with control and *Pax6* expression vectors. Clonal siblings are labeled by co-electroporation of *Cytobow/Nucbow* and the self-excision Cre expression vector. (C-F) Cell compositions in each clone in control (C, E) and *Pax6*-overexpressed brains (D, F). Progenitors (P) and non-progenitors (N) are distinguished by Sox2 expression. High-dose Pax6 decreases the proportion of progenitors and increases non-progenitors in individual clones. n=2 brains for each case.

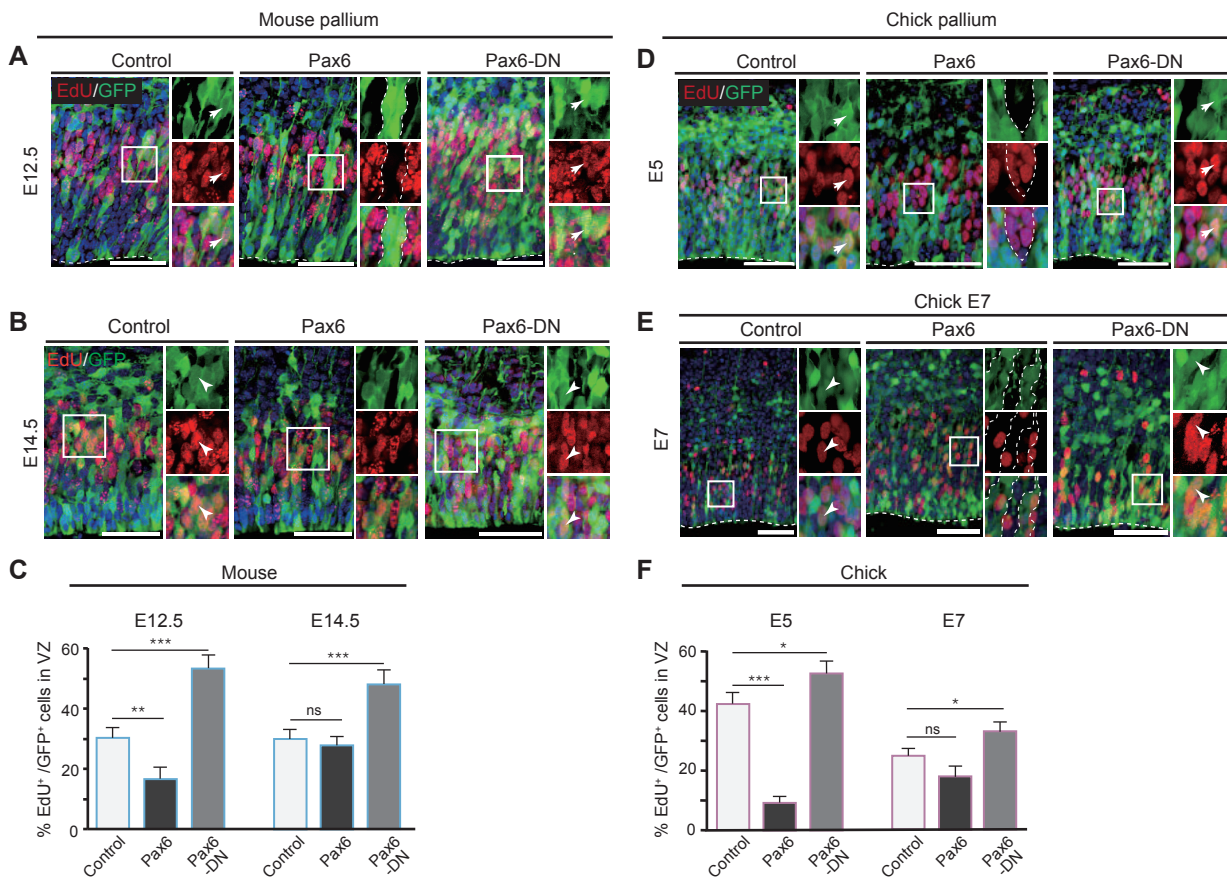

**Fig. S3 (related to Fig. 2). Pax6-dependent negative regulation of progenitor proliferation in the developing mouse and chick dorsal pallium.**

(A, B, D, E) EdU-positive cells in the E12.5 (A) and E14.5 (B) mouse and E5 (D) and E7 (E) chick dorsal pallium after electroporation of control (GFP), *Pax6* or *Pax6-DN* vectors. Insets show representative EdU-positive cells in GFP+ transfected cells (white arrowheads). (C, F) The proportion of EdU-positive cells in GFP-positive cells in the VZ of mouse (C) and chick (F) dorsal pallium. Data indicate the mean  $\pm$  s.e.,  $n=6$  for each case, Student's *t*-test, \* $P < 0.05$ , \*\* $P < 0.01$ , \*\*\* $P < 0.005$ . Scale bars: 50  $\mu$ m.

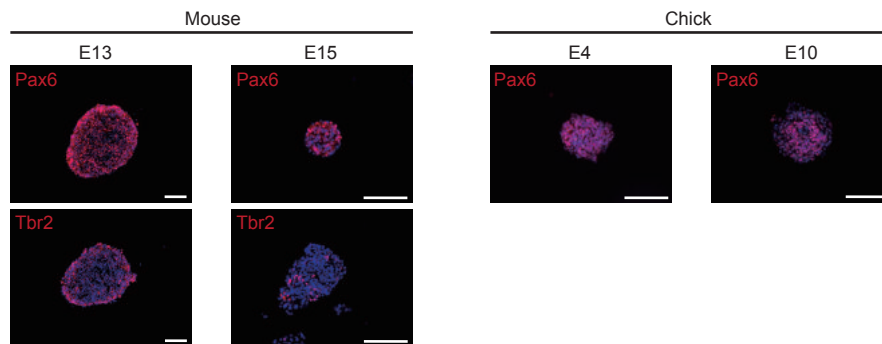

**Fig. S4 (related to Fig. 3). Pax6 and Tbr2 expression in mouse and chick neurospheres.** Immunohistochemistry of neurospheres derived from the E13 or E15 mouse neocortex and the E4 or E10 chick pallium with anti-Pax6 or –Tbr2 antibodies. Scale bar: 100  $\mu$ m.

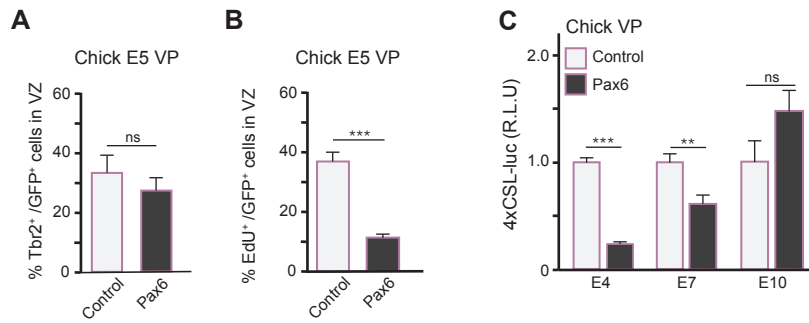

**Fig. S5 (related to Fig. 3). Pax6 gain-of-function analysis of chick ventral pallial progenitors.**

(A, B) Tbr2- and EdU-positive cells in the E5 chick ventral pallium after electroporation of control (GFP) or Pax6 vectors. (C) Pax6-dependent changes in Notch reporter (*p4xCSL*-luciferase) activity in neuronal progenitors from the E4, E7 or E10 chick ventral pallium. Data indicate the represented mean  $\pm$  s.e., at least  $n=3$  for each case, Student's *t*-test, \* $P < 0.05$ , \*\* $P < 0.01$ .



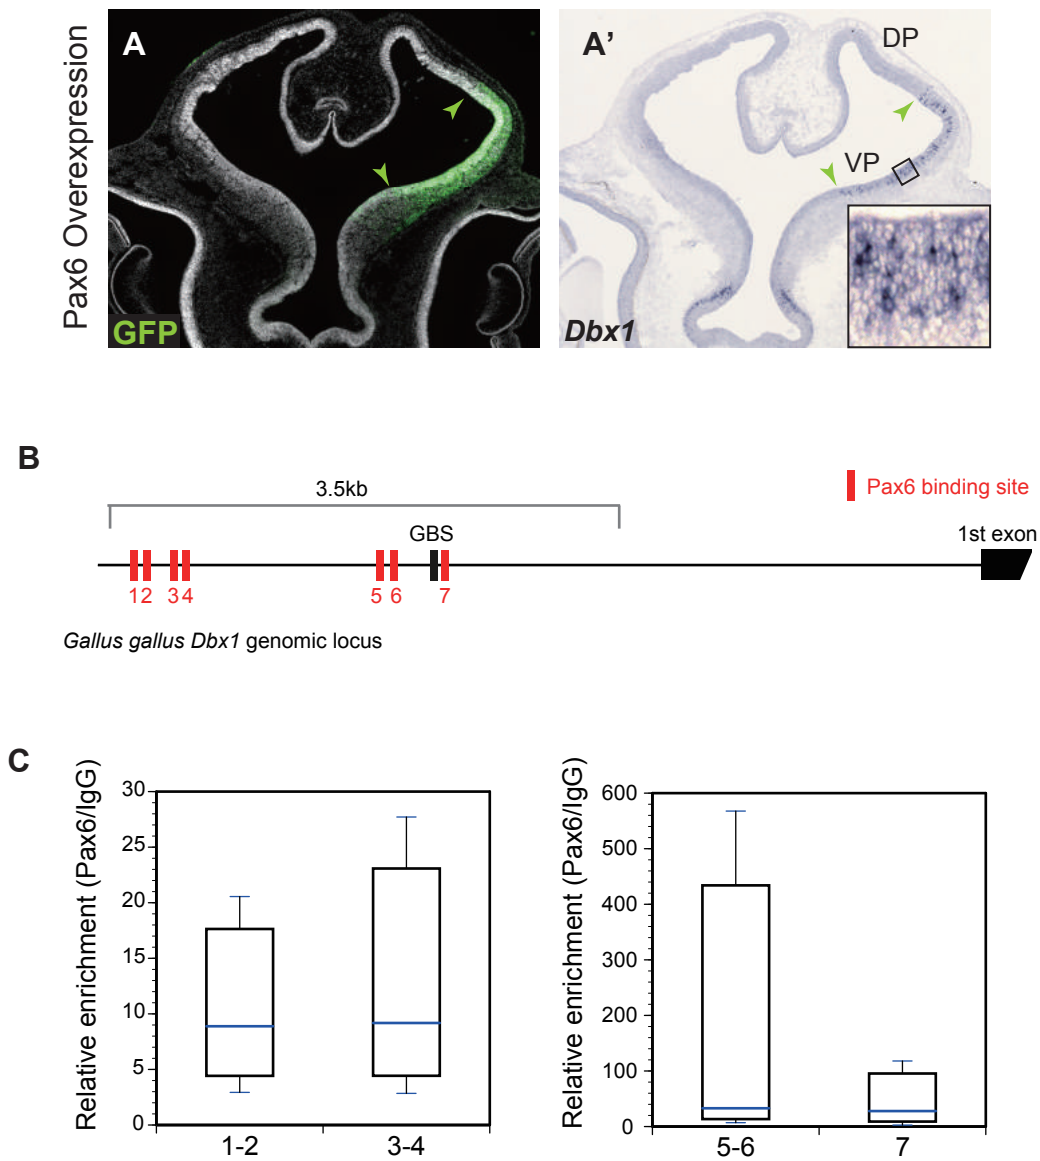

**Fig. S6 (related to Fig. 4). Pax6-dependent activation of *Dbx1* and physical interaction of Pax6 on *Dbx1* 3.5-kb CRM**

(A) Electroporation of Pax6 induces *Dbx1* expression in the developing chick ventral pallium (VP). (B) Distributions of putative Pax6 binding sites in chick *Dbx1* 3.5-kb CRM. GBS: Gli-binding site reported previously (Oosterveen et al., 2012). (C) ChIP-qPCR demonstrating relative enrichment of Pax6 binding sites (1-2, 3-4, 5-6 and 7) after immunoprecipitation with anti-Pax6 antibody.

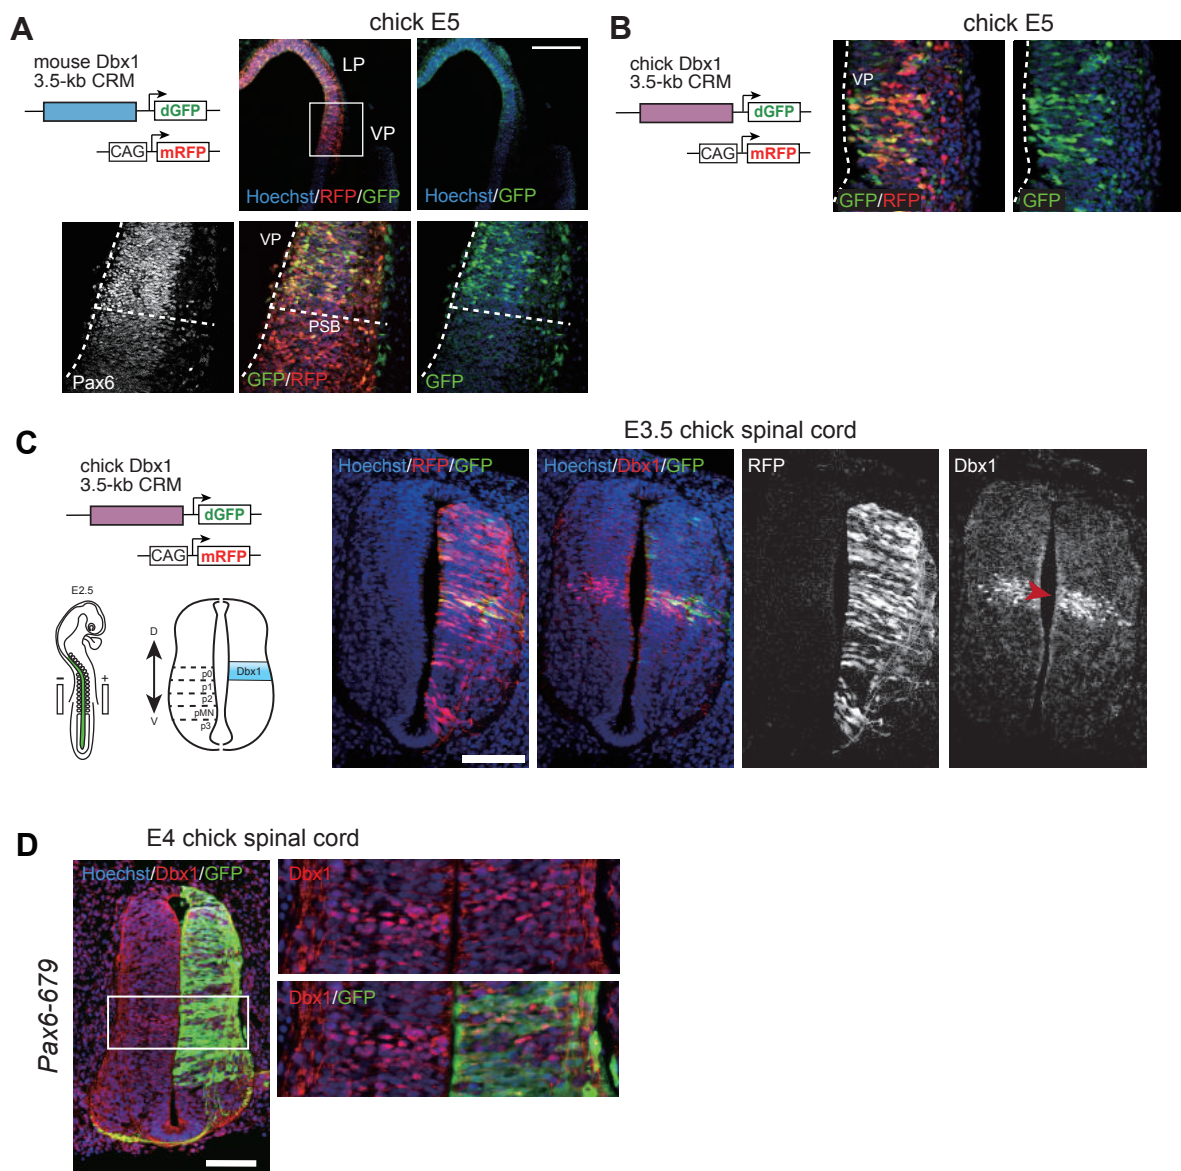

**Fig. S7 (related to Fig. 5). Conserved enhancer activity of mouse and chick *Dbx1* 3.5-kb CRM in the developing chick pallium and spinal cord.**

(A) dGFP expression driven by mouse (A) or chick *Dbx1* 3.5-kb CRM (B) in the developing chick pallium (E5). (C) Electroporation of chick *Dbx1* 3.5 kb-CRM reporter vector and *pCAG-mRFP* vector into the E2.5 developing chick spinal cord. The expression pattern of dGFP is consistent with endogenous *Dbx1* expression in the developing spinal cord. (D) Electroporation of *px330-Pax6-679* down-regulates *Dbx1* in the spinal cord. Scale bars: 100  $\mu$ m (A), 50  $\mu$ m (C). Scale bars: 100  $\mu$ m (A), 50  $\mu$ m (C, D).





```

mouse_Dbx1-3.5kb chick -----
CCTGTCTTCCCTAAAGAGTTTATACCTTCCCAAGAGTTTACTTCCCTAAAGAGTTTATA 60

mouse_Dbx1-3.5kb chick -----
CCTGTTCTACATTCCAGTCATGAGAGCCATTCTGCCACGTCTCCATGATGCCAATTGCAT 120

mouse_Dbx1-3.5kb chick -----
CATAGCCCATAGGCATGCACACCACGCACCTGTAACCTCATCTTACTTGTCTCCATGCT 180

mouse_Dbx1-3.5kb chick -----
CTCTGCGTTAGCATACAGGCATTTAAGTTGGGC-----CCCATTAAGGCCTAATCAATTGGAGT 240

mouse_Dbx1-3.5kb chick -----
TCCCTTGTCTTCACTTCAGATGTTCTTCTTCTTCCGCTGTGGTCTATTCAGGACATCC 300

mouse_Dbx1-3.5kb chick -----CTGAGAAGGCTGGAAGAG-----GGCATCAGAT 28
ATTATCGTCATCAGCCTCAAAGTGTGAGGAGTTGAAGACCACCTCCTCCAGCATGAGCT 360
          * * * * *
mouse_Dbx1-3.5kb chick TACGCTGGAGCTGGAGTTACAGACAGTTGTGTGCCAC-CTGATGTGGGTGCTAGGAATAG 87
TTTCCCTGACTTCAGCTCTGATAGAGCAAATAACGTTCTCAGCTAAAGCTACGGGGAA 420
* * * * *
mouse_Dbx1-3.5kb chick AA---CTCTGGTCTCAGCAAGGGCAGC-ATACTCTCTTAACTGCTGAGCCATACCTCA 142
AAGCTTTTCTAAAATTGCTTAGCATTGCTCTCCTTAGTCCATGACACTCCATT 480
** * * * * *
mouse_Dbx1-3.5kb chick AATCTCCAGAAGTGGTTAATATTAACATGGCA---ACTGGCCAAGAG----CCAGGTT 194
TGCTTTCAGAAAAGCTGTAGACATCAGTGGAGGACTGATGGGACATGTATCTCCCAGCCT 540
* * * * *
mouse_Dbx1-3.5kb chick GCTGTAGACCCCAACATAGGACATAGACTTCTTATATGGAGCATG-AACAAAAGTCTG 253
GATGGCTGGTGGAAAACA-GGGACAGCATTTCTTCTCTGTCAGATAGCAGCACCATT 599
* * * * *
mouse_Dbx1-3.5kb chick TTCCAGGAAGGGCGGAGTGGTCTCCAGG----ATCTGTACCCAAGATACCAGTTCCT--C 307
CTCTGAGGAGGAACACTTCCACAGCAAACTCCCATCAAAGTGTCTGGTCTTTGC 659
** * * * * *
mouse_Dbx1-3.5kb chick CAGGATGACCTCTGCTGGGGTGCAAAGGAGCAGCTGGTCCACACCTGGGTCTGGGAGA 367
TATTTCAAAGAAATCTTACAAGTGCAAGTGAGATCTGAACCTCACC--AACTTTTCTCTGG 717
* * * * *
mouse_Dbx1-3.5kb chick TCAGAGAAGGGTGAACAGATATCTGTCTGTGGACA-AAAGCAGCCATTTTGGTAAAGGAAG 426
TGATAGAATGGAAGAGAGACTTTTCATCTCCAAATACAGGGAAGCCACACATCT--GCAA 775
* * * * *
mouse_Dbx1-3.5kb chick GGCAGCCTTTTACCCAGCCAACCTTACCTTACCTTAAGCCTCT--CTGAATGAGGAAGA 484
AGCAAACCCAGAAGAATGGCAGCCCGCTCCAGTCTCTGCAATAAGCCGAGTGTTCCTTA 835
*** * * * *
mouse_Dbx1-3.5kb chick GACAGAAAATCAATAGGTCGAATTTGGGATAAGAAAGGGGAGCGGGGGGGGGGAGA 544
AAGAGAACAACTCTTACTCACACTCTGCAAAGAATGGTGGTCTGAGTCCAGAGCTATG 895
* * * * *
mouse_Dbx1-3.5kb chick CTTGGAAAGAATGAAGCTGCAGCGTGAATGAAGCAACTGAGGCTCATGACAAGGATGGTG 604
GACTCGGATCAGTTGCAAAACCTGAAGAGGTGTTAGTGGTACACAAGACTACAAAGCTA 955
* * * * *
mouse_Dbx1-3.5kb chick GCTAA----GGAGGAGACCCTCTTTCTTCCACTGGTGTCCAGGC--AATACCTCTCTGG 657
TTCATTCCTTGGCCACAACTATTCATCTCCATCATTCTTCTGTCTGAAACATCTCAA 1015
* * * * *
mouse_Dbx1-3.5kb chick TGGAGGGAGGGCCTAAGAGTAGCTTCAATGGGCAGAAAGGTCAGGATAGAACCTGAGG 717
GTCAGCAAAAAGCAGCCACAAGGGCAAACAGAAACGTTGGCTGCCTGCTTTCATCTGCTT 1075
** * * * *
mouse_Dbx1-3.5kb chick GTTTG-TTCATCTCTGAGACCTGGGAGTGG-----GGAGAGCAAAATGTAGGCTTGGGA 769
TTCCAATTTACATCAAGGAACCTTAGAGCAGAACCTCATGGACTGCATGGACCAGAGCTTTC 1135
* * * * *
mouse_Dbx1-3.5kb chick CAACCCGTCTCCTGCTGGC-CAATGTAC--AGGCCCAACAGGTC----TTGCTTCCCT 822
TGATTCATTTCTTATCGGCTCTATGAAGTGAACCCCTGCAGGACAAAGTTTCTTCTCT 1195
* * * * *

```

```

mouse_Dbx1-3.5kb      CTTCTGAAATACTTCTTTCTGGCATTTCAT-TCTAGGCCCAAAGGCTCAGCTATTGGGGC 881
chick                  CTCTTCTCAGTCAAAGCTCTGGAAATCAAATATATTGTATACGTCTTTCCAAAAGGC 1255
**          * *          ***** * ** * **          * ** * ** * **

mouse_Dbx1-3.5kb      CC-CAGAGGCAGTGTGGCAACAGCAGGAGTGTTTTCCATTCCAAGAAGCTCAA----- 934
chick                  CAGCACATGTAGTCTCCTCTGTGGATGCAGTTCAGTTTACCAGAGACCTATGGATGA 1315
* ** * ** * **          * ** * ** * **          * ** * ** * **

mouse_Dbx1-3.5kb      -----AGTGGAAAGTTTTTTTTTTT-----TTTTTTTTTTTTTTTTTTAAGAGCTC- 979
chick                  GTACAGCAGTGGGTAGGGCTGGTCTGAAGAGATTTACCACTGCCATTGGCAAACGATCA 1375
          ***** ** * ** *          ***** * ** * ** * **

mouse_Dbx1-3.5kb      -----TATGAAACAACCTTTTATCTCACCCATGGATCCACTGAGGCTCGGGGGAAGAGG 1033
chick                  CCATTTTGTGTTGCAGTCAAGTACAGTAGGAGTAGAGTTGAAACCTGATTGGGGTGGGGG 1435
          * ** * ** * **          * ** * ** * **          * ** * ** * **

mouse_Dbx1-3.5kb      ACTTTCCTTTACAGC-ACACCA--TAAGCGAACTCATGCAAACATGAGTTAAAAGGCAA 1089
chick                  AATCCTTTAATCTCTGCACCGACTTTAGTGGAAACCAGAGAAGTACATGTTGGA-GAA 1494
* * ** * **          * ** * **          * ** * **          * ** * ** * **

mouse_Dbx1-3.5kb      GAACTGGGCTGGTAAGGCGCTTGCCCAAGCCAGATACCCTGACTTCAATTCAGGAC 1149
chick                  TAAGGAGGAAGGTA--TCACTTTCCTTGTCTTGTAGGAAATTAGGGCAAAGAATAAAGT 1552
          ** ** ***** * ** * **          * **          * ** * ** *

mouse_Dbx1-3.5kb      CCACCCATCTGGTAGGACAGAACCAACTCTGCCAGTTGTCTCTGACTTACACACACAC 1209
chick                  AC-TGTGTTGCACTCTGCAAACCCAGTCTCCAAGTACACACAACCCAGTCTGTGAAA 1611
          *          *          * ** * ** * ** * ** * **          * ** *

mouse_Dbx1-3.5kb      ACACACACACACAGAGAGAGAGAGAGAGAGAGAGAGAGAGAGAGAGAGAGAGAGAAAG 1269
chick                  GAAGTGGCTTTAGGGAGGTTGTCATTTGATGTTGTTTATTAGCCAGTCAAGTGGAG 1671
          *          * ** * **          * ** * **          * ** * **          * **

mouse_Dbx1-3.5kb      AGAGAGAGAGAGAGACTATTTTTAAATTCAAAGATTAGAATTAGGCAATCGAGAAAAGA 1329
chick                  A-AGAAAGAAGGAGGATTGTTCAACCCCTGGAATATTACTATTTTAAACAAGAGTGGAG 1730
* ** * ** * **          * ** * **          * ** * **          * ** * **          * **

mouse_Dbx1-3.5kb      GAAGGGAGTTTATCTTCAAGACTAAGAGTGTAACCTTTGAACTTAATTTCTCAGATAAG 1389
chick                  TTGGGGAACAGATAAA-AGGATGAGGTGGGCAAAAATT--ATCATATCTGCAAGAAAGG 1787
          ***** **          * ** * ** * ** * ** * **          * ** * ** * **

mouse_Dbx1-3.5kb      TGGTGGGGGATGGGGGAGGTGATAGAAAG-GCACTGAAGCCTCGGCTCACCAA--GGTT 1446
chick                  TGCCAAGTAAACAGGCTAGGGAAGAGTTAGCAAGCGTAAGCAAGACACAGGGACTAAC 1847
**          * ** * ** * **          * ** * **          * ** * **          * **

mouse_Dbx1-3.5kb      TAATTTTGATCATTTCAGTGGGCTCTGATGTACTGCCTAGCACTCTAGGGCTTTGCATC 1506
chick                  TAAAGTAAATTAATCTCTGACAAGACGGGATCATCTGGTT-GCATTTCAGGCCATGCGCT 1906
*** * ** * **          * ** * **          * ** * **          * ** * **          * **

mouse_Dbx1-3.5kb      CCTGGGAAGGAGGGGGGGCTCAGGGGACTACCAAGCCAGTACCCTGCACTGGGCTGC 1566
chick                  TCTGGGCTGGCCAGGATGAATGGTGAGGGAGAAGAAAGTAAC-TCTCCCTCCAGTCCC 1965
          ***** **          * ** * ** * ** * ** * **          * ** * ** * **

mouse_Dbx1-3.5kb      CCTACAGAG---AGCCTTTTCTTTGAATTAATAAAAAAAAAATTAAGGAAAAAGAAAAG 1622
chick                  CTGCAAGTCTGGGCCGACGCTCTGTCCAAGATCCCTCTTTCTTTGCTCAGAGAGAG 2025
** * **          * **          * ** * **          * **          * ** * ** *

mouse_Dbx1-3.5kb      AAAACACAAAAAACACACACAGCTTAAACCCTGTCAGGGCTGAGGATACAATAAG 1682
chick                  GAGGGGAGAGGAGAGAAACACAGTTAAACCCTGTCAGGGCTGAGGACACAATAAG 2085
          *          * ** *          * ***** * ** * ** * ** * ** * **

mouse_Dbx1-3.5kb      GCCTTGGAAAAAGAGCTTTTCATGCATGCCTAATATATTTGTTACAGTATTCACCTAATG 1742
chick                  CAGCCCCAAAAGAGCTTTTCATGCATGCCTAATATATTTGTTACAGTATTCACCTAATG 2145
          ***** * ** * ** * ** * ** * ** * ** * ** * ** * ** * **

mouse_Dbx1-3.5kb      AAGCTGATCAATGTGATGGGAGACAATGGTCAAGTTAATCTATTTAGTAAAATGTTTTGA 1802
chick                  AAGCTGATAAATGTGATGCGAAACAATAGTCAAGTTAATCTATTTAGTAAAATGTTTTGA 2205
***** * ** * **          * ** * ** * ** * ** * ** * ** * ** * **

mouse_Dbx1-3.5kb      GACTTTCAGGCTATGAGAAGGAGGGGAGCCT--TTGGCGACATTTTCATTTAAATAACAC 1860
chick                  GACTCTCAGGCGATGTTAAGGAGGGTAGTGTGTTGAGGACATTTTCATTTCAATA-CTC 2264
**** * ** * **          * ** * **          * ** * **          * ** * **          * **

mouse_Dbx1-3.5kb      TCCTCTCTCTTAGGCTGCACAAGGGGGTTCAGGCAATCTATGTGAATATAATTTCTTATA 1920
chick                  TCATCTCTCCC---CTCTTAGGGGGTTCAGGCAACCTATGTGAATATAATTTCTTATA 2321
** *****          * ** * ** * ** * ** * ** * ** * ** * ** * **

mouse_Dbx1-3.5kb      AACGTGCTCTTAAATGGGTTAATTCACCTTGCCAGCTGTTTTGGGAGCTATTTTGTAAAG 1980
chick                  AATGCTCTTAAATGGGTTAATTCACCTTGCCAGCTGTTTTTTAGCTATTTTGTAAAG 2381
** ***** * ** * ** * ** * ** * ** * ** * ** * ** * **

```

```

mouse_Dbx1-3.5kb  AGCAAAACAAACGTTGCAGGCCGTGAAAGCTAGTTAAAATTAGTTTCGGTCAGCGAGGCC 2040
chick              AGCAAAACAAACGTTGCCAGGCCGTGAAAGCTAGTTAAAATTAGTTTCGGTCAGCGAGGCC 2441
*****          *****

mouse_Dbx1-3.5kb  AAGCTATATTTTCTAGAAACCATCTGCCTTGATTGGCACAATAGGAGGATTTTCTAGGAAA 2100
chick              AAGCTATATTTTCTGCAACCATCTGCCTTGATTGGCACAATAGGAGGATTTTCTAAGAAAA 2501
*****          *

mouse_Dbx1-3.5kb  AAGAGGGGAGCGAGTGTGAAAGGAAGGGGGGCGTGCTAGAA--ACGGTTGGGGCCGCTGG 2158
chick              AAAAAAAAAAAAAAAGCGCGGGGGGGGGGGGGGGGGGGGGGGGGGGGGGGGGGGAGTTGTTGAATCTAG 2561
** *          * * *

mouse_Dbx1-3.5kb  TAGCTCCTTGGGCCTATTTCTAAAGGTGAGCCCTTAGCGTTATCTTAATAGAGGCTGGAG 2218
chick              AAAAGCTTTGAGCGAACCAACAGTTACTGTTCCCTGTTCTGAATTC--TAAAGG-TGCAG 2618
* * * * *          * * * * *

mouse_Dbx1-3.5kb  CTGTAGAAACGCTTTCTGGCTGTGCCTGGAGCACTCCTCCGTTGCCAGTCCAGACAGCAT 2278
chick              CCTTAG---GTGTGCGAGTGCAGCCCATTTAGGCTCCCGGCCCGGCCGGA--GCGG 2672
* * * * *          * * * * *

mouse_Dbx1-3.5kb  TCTCCTCCCGACCGGGAGAAGCCTGGGGTGGGGTGGGGATGGGTGGGTGCAAGTCCCT 2338
chick              CCGTCCCGG---GGGAGCGCAGGCAGCAGCGGACGGAGCGCTTCGTTTCATCCCGCC 2729
* * * * *          * * * * *

mouse_Dbx1-3.5kb  GTAGCCTCCTACTCAGGGAAGTCC--CGCCTCTTCTAGTGTACTTTCATGTTCCAG 2396
chick              CGGCCCTGGGCGGCCCGCGCTGCCCGCGCACTCCGGGAGC-CGGGCCGGCGCTCCGT 2788
***          * * * * *

mouse_Dbx1-3.5kb  TGCGGTGCGGAGGACAAAGCCTGTGGGTTGTCAGCTTGCAAAAGGCAGCCTTAGCATCC 2456
chick              GTCCGCGCTGGAAGTGGCGGCTCTCCAATTTCA---TGCGGATTACCAACCCCGGCCG 2845
* * * * *          * * * * *

mouse_Dbx1-3.5kb  TGCAACCTGAAGCTGGCACCCTTTCATTCCTGAGAGCTGTGA-AGCTCCTCGCCAGG 2515
chick              GGACACGCGAGACTGCGCCCGCCCTCGGCCCGCCCGCGGTTAGTCCCGCCCTTT 2905
* * * * *          * * * * *

mouse_Dbx1-3.5kb  TGGCCCAAGTTTCTTAGTCTAGACACTCCCGGCTGGAGAGGTCTGTGAGAGCCAGGA 2575
chick              TTTTTCCTCTTTTTCGCGTAAGAA-----AGCGAGTGAC-TTTTGTAGAAATAAATTT 2958
* *          * * * * *

mouse_Dbx1-3.5kb  GGTCTAAAGCACTTACTTGCCTAACCAAAAGGGACACTCAGCTTCTCTGGCTAGGGCC 2635
chick              GAAGATAACGACATTAATAATG---AATGGCAGGAAGCACAACCTCGTGAGCATAGGTC 3015
* * * * *          * * * * *

mouse_Dbx1-3.5kb  TGGGGCTGGGGCTGGATCTGCAGCAGCCTGGTGTGCAAAAGCAGAGTAGGACCTGACCCC 2695
chick              -----AAACGGCATTAGTCACAGGTTT-TATCCCGGCACATTAGAATTCCTTCTCT 3066
* * * * *          * * * * *

mouse_Dbx1-3.5kb  CTAGCCGAGTCTCCTCTTATCTTTTTTCTTTGGTTTTGCTTTTTGAGACAGGGTCTTAC 2755
chick              TAAGTGATCACCCGCTTTGAAAAGAACTTCCAAGGAGATCGCTGAAAATGAGATCCTT 3126
**          * * * * *

mouse_Dbx1-3.5kb  TTTGCAGACTTGGCCAGCCTGGAAGTCACTGCCTAGAGTAGGCTGGTCTCGAAGTCTCAG 2815
chick              TCGTCTGATTTCTGGTTC-----CTCGGGCTCTCGTCCCTTCAATAGACGCTC-- 3179
* * * * *          * * * * *

mouse_Dbx1-3.5kb  AGATCCTCTTGCCTT--TACCAATTGGATGCCAGGATTAAGGTGTGCACCTTCTTCCCT 2873
chick              -GTCCCTTTGCGGTGGTGTCTAAGGAATCT---TTACGAGTGTGCTCAGACGATCG 3234
* * * * *          * * * * *

mouse_Dbx1-3.5kb  GGAAAGAGAAAGGCAGAAAGCTGAAGTGCAGTTAAGAATGGGAATGTTTCTCCGACAT 2933
chick              -----

mouse_Dbx1-3.5kb  AAAGTAAAGATAACGACGACTTACAGTGAATGTCAGGACTCACAAAACCCCTCAAGCT 2993
chick              -----

mouse_Dbx1-3.5kb  CAGGTCAAATGGAATTAGTCACAGGACTTAGGCGCGGCCCATGCGCGTGGCCCTCGGT 3053
chick              -----

mouse_Dbx1-3.5kb  GGCCACGAGTTTGAAGGCGGTTTCAGAAATCACTTTAAAGTAAAGATCCGTTCTCGGCT 3113
chick              -----

mouse_Dbx1-3.5kb  TTTGTTTTATTTGTTTTGTTTTTCTCCCTTAGGATTAATTTGTTCTTTCAATGGC 3173
chick              -----

mouse_Dbx1-3.5kb  GGCCAGCCTTGCTTCCCCACCTCCGCGAACCTCACTTTCGCTCTTTGCCACCAGTGA 3233
chick              -----

```

```

mouse_Dbx1-3.5kb      AAGGGTCTATGTGGATCATGAACGGGTAGACCTACCTTATAGTGAGTCAAGGTGGCCTCG 3293
chick                  -----

mouse_Dbx1-3.5kb      TAAAAACAGAGCTTTAGATACGTTTGGATTGTGGAGAGCAAAACTGCCGGAGGATGAGGA 3353
chick                  -----

mouse_Dbx1-3.5kb      GGGTAGCTAGCCTTCCAGGGCTGCAGAAACCACACCTCCACGGAAGTAACCTCGGGAGGC 3413
chick                  -----

mouse_Dbx1-3.5kb      GGGACCTGGGAAGACCCACTGTGCTGTCTAATCTTTTCTTTCTTGGCAGAAACCTAGCG 3472
chick                  -----

```

**Table S2. Sequence comparison of mouse and chick Dbx1-3.5kb CRMs.**

Pair-wise sequence alignment was performed by CLUSTALW. Asterisks represent conserved sequences. Putative Pax6-binding sites are represented in red (see also Figure S6B). A Gli-binding site (Oosterveen et al., 2012) is shown in green.

**List of primers used for qPCR**

| Target              | Forward primers         | Reverse primers      |
|---------------------|-------------------------|----------------------|
| beta-actin          | CAGACATCAGGGTGTGATGGT   | TCCTCAGGGGCTACTCTCAG |
| Ccnd1               | CTTGGATGCTGGAGGCTGC     | CTGCGGTCAGAGGAATCGTT |
| Cdk6                | GGCCTAATGATGTGGCCCTT    | TCTTGGCTGGATTGAACGCT |
| p27 <sup>Kip1</sup> | GCCGACGATTCCTCTCCTCAAAA | ATCTTCCTGGCTTCACCGCC |
| Notch1              | GAGCAGAGAGGGATGAAGCG    | CACTGCTGCACTGGCACA   |
| Dll1                | TTCGGTCACCTCACCTGTGG    | ACCCACTCTGCACCTGCATT |
| Dbx1                | CAACCGAATCCCAGCTATT     | GGACAGTGGTTTGTCTGCAC |

**List of primers used for pX330 plasmid construction**

|                | Forward primers           | Reverse primers           |
|----------------|---------------------------|---------------------------|
| pX330-Pax6-347 | CACCGCGGCGTGAACCAGCTCGGCG | AAACCGCCGAGCTGGTTCACGCCGC |
| pX330-Pax6-679 | CACCGAGACAGATTACTCTCGGAG  | AAACCTCCGAGAGTAATCTGTCTC  |
| pX330-Pax6-811 | CACCGGATGCTGAACGGGCAGACG  | AAACCGTCTGCCCGTTCAGCATCC  |

**List of primers used for isolation of Dbx1-CRM**

| Target           | Forward primers            | Reverse primers        |
|------------------|----------------------------|------------------------|
| Mouse 3.5 kb-CRM | CTGAGAAGGCTGGAAGAG         | CGCTAGGTTTCTGCCAAG     |
| Chick 3.5 kb-CRM | CCTGTCTTCCCTAAAGAGTTTATACC | CGATGCGTCTGAGCACACTCGT |

**List of primers used for ChIP-qPCR**

| Target | Forward primers       | Reverse primers       |
|--------|-----------------------|-----------------------|
| BS1-2  | ATGCCAATTGCATCATAGCC  | TCCTGGAATAGGACCACAGG  |
| BS3-4  | AGGCTAAAGCTACGGGGAAA  | TGACAAGCAGGAAGAAATGC  |
| BS5-6  | GAGGATTGTTC AACCCTGGA | GATGATCCCGTCTTGTCAGAA |
| BS7    | GAGGGGAGAGGAGAGAGAA   | TTTCGCATCACATTTATCAGC |

**Table S3. Primers used for qPCR, pX330 plasmid construction and ChIP-qPCR**



## Supplementary references

Oosterveen, T., Kurdija, S., Alekseenko, Z., Uhde, C. W., Bergsland, M., Sandberg, M., Andersson, E., Dias, J. M., Muhr, J. and Ericson, J. (2012). Mechanistic differences in the transcriptional interpretation of local and long-range Shh morphogen signaling. *Dev Cell* **23**. 1006-1019.
